# Supplementary material
Source: PubMed Central journal article supplement (PMC5498285)
Supplement: NIHMS818782-supplement-1.pdf [file NIHMS818782-supplement-1.pdf]

## Supplemental Material

### Increasing Tetrahydrobiopterin in Cardiomyocytes Adversely Affects Cardiac Redox State and Mitochondrial Function Independently of Changes in NO Production

Savitha Sethumadhavan, Jennifer Whitsett, Brian Bennett, Irina A. Ionova, Galen M. Pieper, Jeannette Vasquez-Vivar

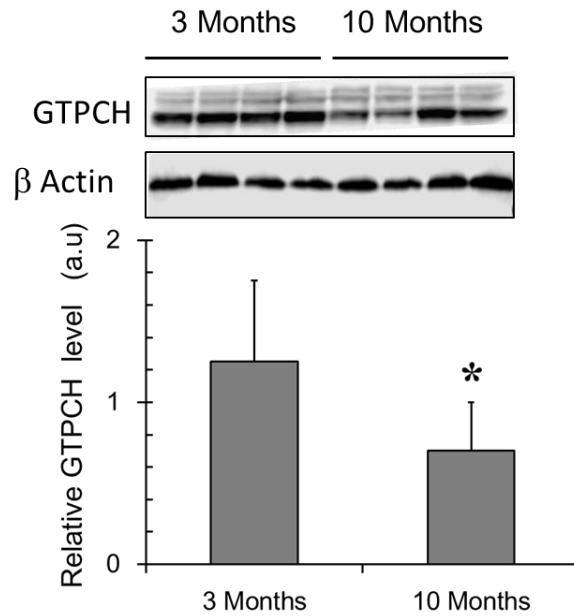

**Figure 1Suppl. GTP cyclohydrolase I expression levels in the LV tissue from 3- and 10 month old transgenic mice.** Freshly obtained tissue was homogenized and proteins were resolved by PAGE-SDS. Values are Mean±SD n=4 samples. \*p<0.05

**Table I. Aconitase activity in cytosolic and mitochondrial fractions obtained from 1, 3 and 10 month old heart overexpressing GTP cyclohydrolase.** Enzyme activity was determined at 25°C following the conversion of isocitrate to cis-aconitate as described in Materials and Methods. Values are Mean±S.D of n=3 except for 1 month n=2. \*p=0.05.

| Age           | Cytosolic                | Mitochondrial |
|---------------|--------------------------|---------------|
| <i>Months</i> | <i>mUnits/mg protein</i> |               |
| 1             | 24.3                     | 8.1           |
| 3             | 28.0±4.2                 | 12.2±2.2      |
| 12            | 20.4±3.4*                | 13.3±3.0      |
